# Supplementary material for: Activation of α2A-adrenergic signal transduction in chondrocytes promotes degenerative remodelling of temporomandibular joint
Source: PubMed Central journal article supplement (PMC4958971; doi:10.1038/srep30085), 2016-07-25
Supplement: srep30085-s1.pdf [file srep30085-s1.pdf]

**Activation of  $\alpha$ 2A-adrenergic signal transduction in chondrocytes promotes degenerative remodelling of temporomandibular joint**

Kai Jiao<sup>1,#</sup>, Guang Zeng<sup>2,#</sup>, Li-Na Niu<sup>3</sup>, Hong-xu Yang<sup>1</sup>, Gao-tong Ren<sup>4</sup>, Xin-yue Xu<sup>4</sup>, Fei-fei Li<sup>5</sup>, Franklin R. Tay<sup>6,\*</sup>, Mei-qing Wang<sup>1,\*</sup>

**Supplementary Table1** Gene primers

| Genes          | Forward primer           | Reverse primer           |
|----------------|--------------------------|--------------------------|
| $\alpha$ 1A-AR | GAGTCAGCAGTGCCAAGAATAAGA | AACGGTTTCCGAAGGCTTGA     |
| $\alpha$ 1B-AR | CCCAGGAGTTCCATAGCTGTCAA  | TGAAGTAGCCCAGCCAGAACAC   |
| $\alpha$ 1D-AR | CCATCGTCGTGGGTGTCTTC     | GTAGATGAGCGGGTTCACACAG   |
| $\alpha$ 2A-AR | CTTGGCCCTCGACGTGCTCTTTTG | CGGCGGCGCGGAACAGG        |
| $\alpha$ 2B-AR | TCGGCCATCACCTTTCTCATCCTT | GGGCGTCGGGGCGTTGGTC      |
| $\alpha$ 2C-AR | TGGCTCATCTCGGCTGTCATCTCC | TGTCCCCCTCGGCACCCTCTC    |
| $\beta$ 1-AR   | TCTGTGAGCTCTGGACTTCGGTA  | GATGACACACAGGGTCTCGATG   |
| $\beta$ 2-AR   | GATTGCAGTGGATCGCTATGTTG  | GACCACTCGGGCCTTATTCTTG   |
| $\beta$ 3-AR   | CCCTTTCTTCCTACTGCTTTCCT  | TTTGTGCCTATTGTGAGAGATGGT |
| aggrecan       | ATGATGGCGCTGTTCTGAAGG    | GAAGTGATGCATGGCATTGAGG   |
| Col2           | ACCTCGGATTCCAATAGGACCAG  | TTCCCGGTGAATTCGGTCTC     |
| ColX           | GGCTACTTGGATCAGGCTTC     | CTGAGAAGGACGAGTGGACA     |
| MMP3           | TCTTTCACTCAGCCAATGCT     | GGGAGGTCCATAGAGGGATT     |
| MMP9           | GAGCCACGACCATAACAGATG    | CGCTGGGCTTAGATCATTCT     |
| MMP13          | GCAGCTCCAAAGGCTACAA      | CATCATCTGGGAGCATGAAA     |
| RANKL          | TCGGGTTCACATAAAGTCAG     | CTTGGGATTTTGATGCTGGT     |
| OPG            | TGGGAATGAAGATCCTCCAG     | GAGGAAGGAAAGGGCCTATG     |
| GAPDH          | TGTGTCCGTCGTGGATCTGA     | TTGCTGTTGAAGTCGCAGGAG    |

AR: Adrenoreceptor

## Supplementary Figure 1

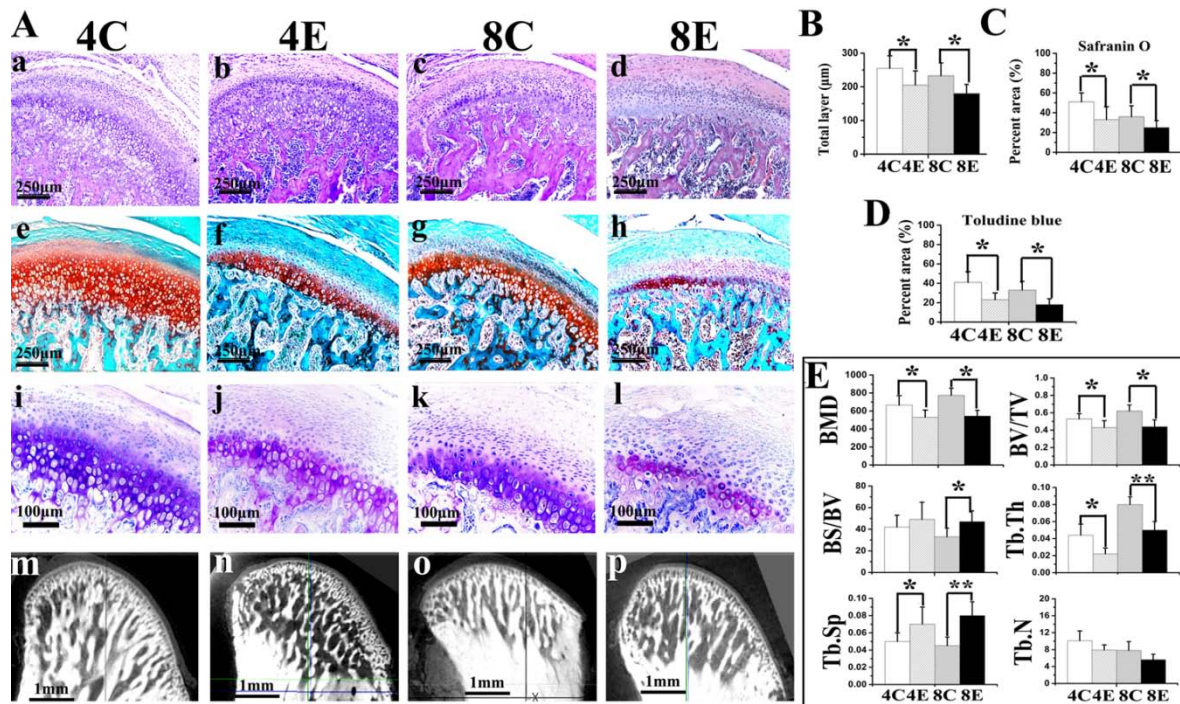

**Supplementary Figure 1** Cartilage degeneration and subchondral bone deterioration observed in 4- and 8-week experimental rats. (A) Cartilage degeneration were observed by H&E (a-d), Safranin O-fast green (e-h) and toluidine blue (i-l) staining. Microarchitecture of subchondral bone was quantified by micro-computed tomography (m-p). (B-D) Thickness and percentage area of proteoglycans within the condylar cartilage of 4- and 8-week control and experimental rats (N=6). (E-H) Bone mineral density (BMD) and microstructures of subchondral condylar bone in the 4- and 8-week control and experimental rats (N=6). C: control rats; E: experimental rats. Levels of significance: \*P<0.05, \*\*P<0.01: vs age-matched controls.

Supplementary Figure 2

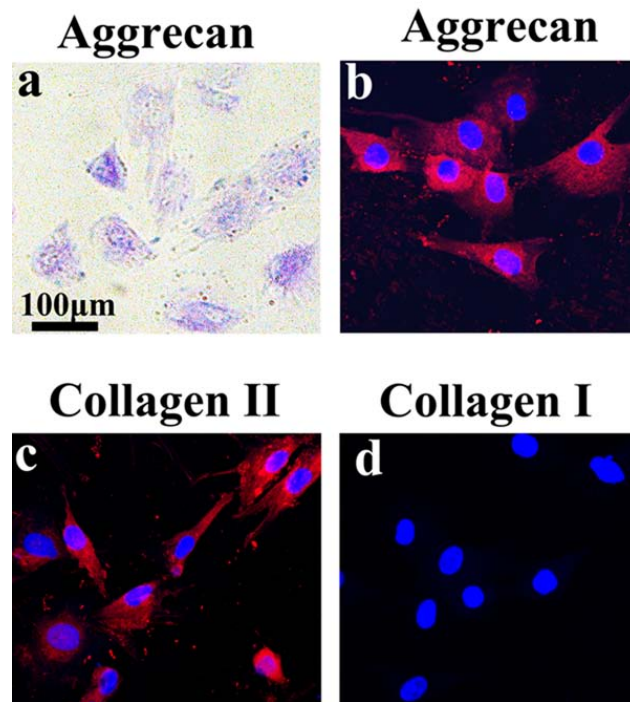

**Supplementary Figure 2** Chondrocytes identification. Chondrocytes were identified by (a) toluidine blue staining and (b) immunofluorescent staining of aggrecan, and (c) type II and type I collagen.

Supplementary Figure 3

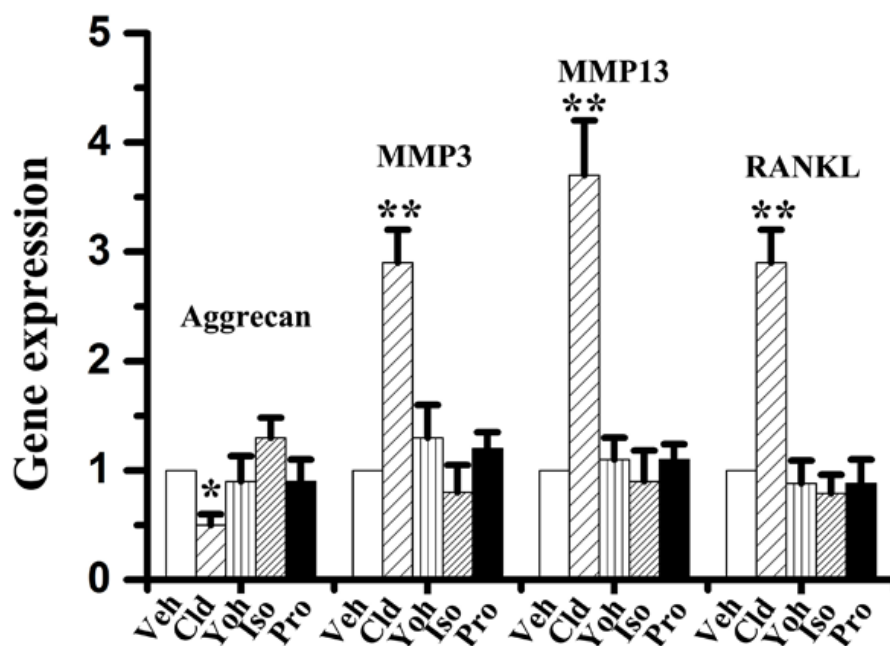

**Supplementary Figure 3** Real-time PCR of the expression of aggrecan, MMP-3, MMP-13 and RANKL by chondrocytes treated by  $\alpha$ 2-adrenoreceptor agonist/antagonist or  $\beta$ 2-adrenoreceptor agonist/antagonist (N=5). The chondrocytes were isolated from condylar cartilage of 6-week female rats and were stimulated 24 h by saline vehicle (Veh),  $10^{-4}$  M clonidine (Cld,  $\alpha$ 2-adrenoreceptor agonist),  $10^{-5}$  M yohimbine (Yoh,  $\alpha$ 2-adrenoreceptor antagonist),  $10^{-6}$  M isoprenaline (Iso,  $\beta$ -adrenoreceptor agonist) or  $10^{-5}$  M propranolol (Pro,  $\beta$ -adrenoreceptor antagonist). \*P<0.05, \*\*P<0.01: vs vehicle-treated controls.

### Supplementary Figure 4

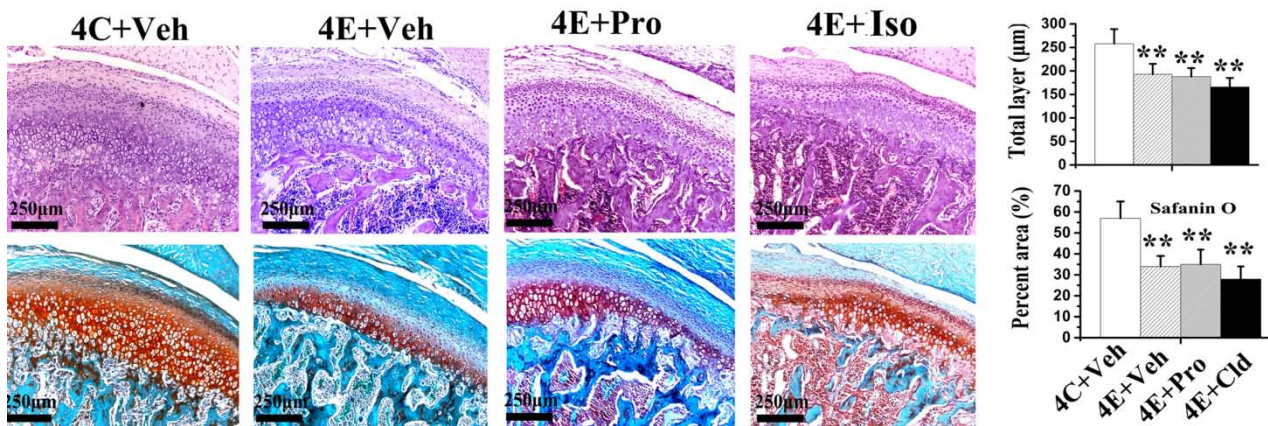

**Supplementary Figure 4** Effect of blocking/activation of  $\beta_2$ -adrenoreceptor on condylar cartilage degenerative remodelling. Cartilage degradation was observed by H&E and Safranin O-fast green staining in 4-week control rats and experimental rats which were injected with saline vehicle (Veh), propranolol (Pro,  $\beta_2$ -adrenoreceptor antagonist) or isoprenaline (Iso,  $\beta_2$ -adrenoreceptor agonist). The thickness and percentage area of proteoglycans of the condylar cartilage were compared (N=6). C: control rats; E: experimental rats. \*\*P<0.01: vs vehicle-treated control rats.
